# Supplementary material for: RAGE deficiency does not affect non-alcoholic steatohepatitis and atherosclerosis in Western type diet-fed Ldlr−/− mice
Source: PubMed Central journal article supplement (PMC6189204; doi:10.1038/s41598-018-33661-y), 2018-10-15
Supplement: 41598_2018_33661_MOESM1_ESM.pdf [file 41598_2018_33661_MOESM1_ESM.pdf]

## **RAGE deficiency does not affect non-alcoholic steatohepatitis and atherosclerosis in Western type diet-fed Ldlr<sup>-/-</sup> mice**

Mitchell Bijnen<sup>1,2</sup>, Nicky Beelen<sup>1,2</sup>, Suzan Wetzels<sup>1,2,3</sup>, José van de Gaar<sup>1,2</sup>, Maria Vroomen<sup>1,2</sup>, Erwin Wijnands<sup>2,4</sup>, Jean L. Scheijen<sup>1,2</sup>, Marjo P.H. van de Waarenburg<sup>1,2</sup>, Marion J. Gijbels<sup>2,4,5,6</sup>, Jack P. Cleutjens<sup>2,4</sup>, Erik A.L. Biessen<sup>2,4</sup>, Coen D.A. Stehouwer<sup>1,2</sup>, Casper G. Schalkwijk<sup>1,2</sup> and Kristiaan Wouters<sup>\*1,2</sup>

<sup>1</sup> Dept. of Internal Medicine, MUMC, Maastricht, The Netherlands, <sup>2</sup> CARIM, MUMC, Maastricht, The Netherlands, <sup>3</sup> Dept. of Immunology and Biochemistry, Biomedical Research Institute, Hasselt University, Hasselt, Belgium, <sup>4</sup> Dept. of Pathology, MUMC, Maastricht, The Netherlands, <sup>5</sup> Dept. of Molecular Genetics, MUMC, Maastricht, The Netherlands, <sup>6</sup> Dept. of Medical Biochemistry, Experimental Vascular Biology, AMC, Amsterdam, The Netherlands.

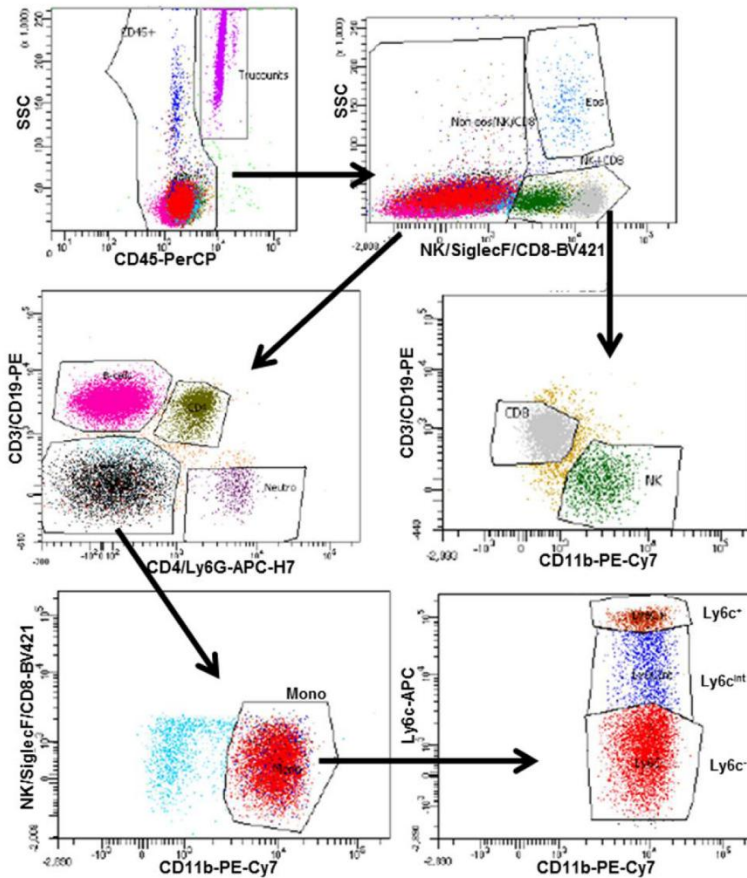

### Suppl. Fig. 1. Gating strategy used for flow cytometry

FACS plots showing gating strategy used for circulating cells starting from CD45<sup>+</sup> cells. First, eosinophils (SSC<sup>+</sup>, SiglecF<sup>+</sup>), NK (SSC<sup>-</sup>, NK1.1<sup>+</sup>) and CD8<sup>+</sup> T-cells (SSC<sup>-</sup>, CD8<sup>+</sup>) were separated and further divided into CD8<sup>+</sup> T-cells (CD3<sup>+</sup>) and NK-cells (CD11b<sup>+</sup>). All other cells were divided into B-cells (CD19<sup>+</sup>, CD4<sup>-</sup>, Ly6G<sup>-</sup>), CD4<sup>+</sup> cells (CD3<sup>+</sup>, CD4<sup>+</sup>), neutrophils (CD3<sup>-</sup>, Ly6G<sup>+</sup>) and remaining cells. Monocytes were separated from these remaining cells using CD11b before splitting all monocytes into Ly6c<sup>-</sup> (patrolling monocytes), Ly6c<sup>int</sup> and Ly6c<sup>+</sup> (proinflammatory) monocytes based on their Ly6c expression. SSC, sidescatter.

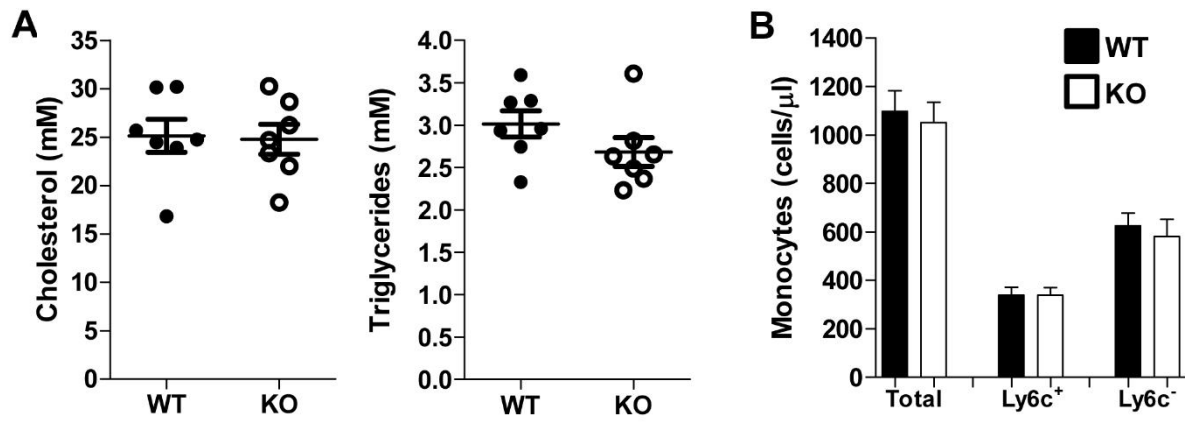

**Suppl. Fig. 2. RAGE does not affect plasma lipid levels or monocytosis**

(A) Plasma cholesterol and triglyceride levels after 3 weeks of WTD feeding. (B) Total circulating monocyte levels and subdivision in Ly6C<sup>+</sup> and Ly6C<sup>-</sup> monocytes measured by flow cytometry and presented as cells/ $\mu$ l after 3 weeks of WTD feeding. All data are means  $\pm$  SEM. n = 7.

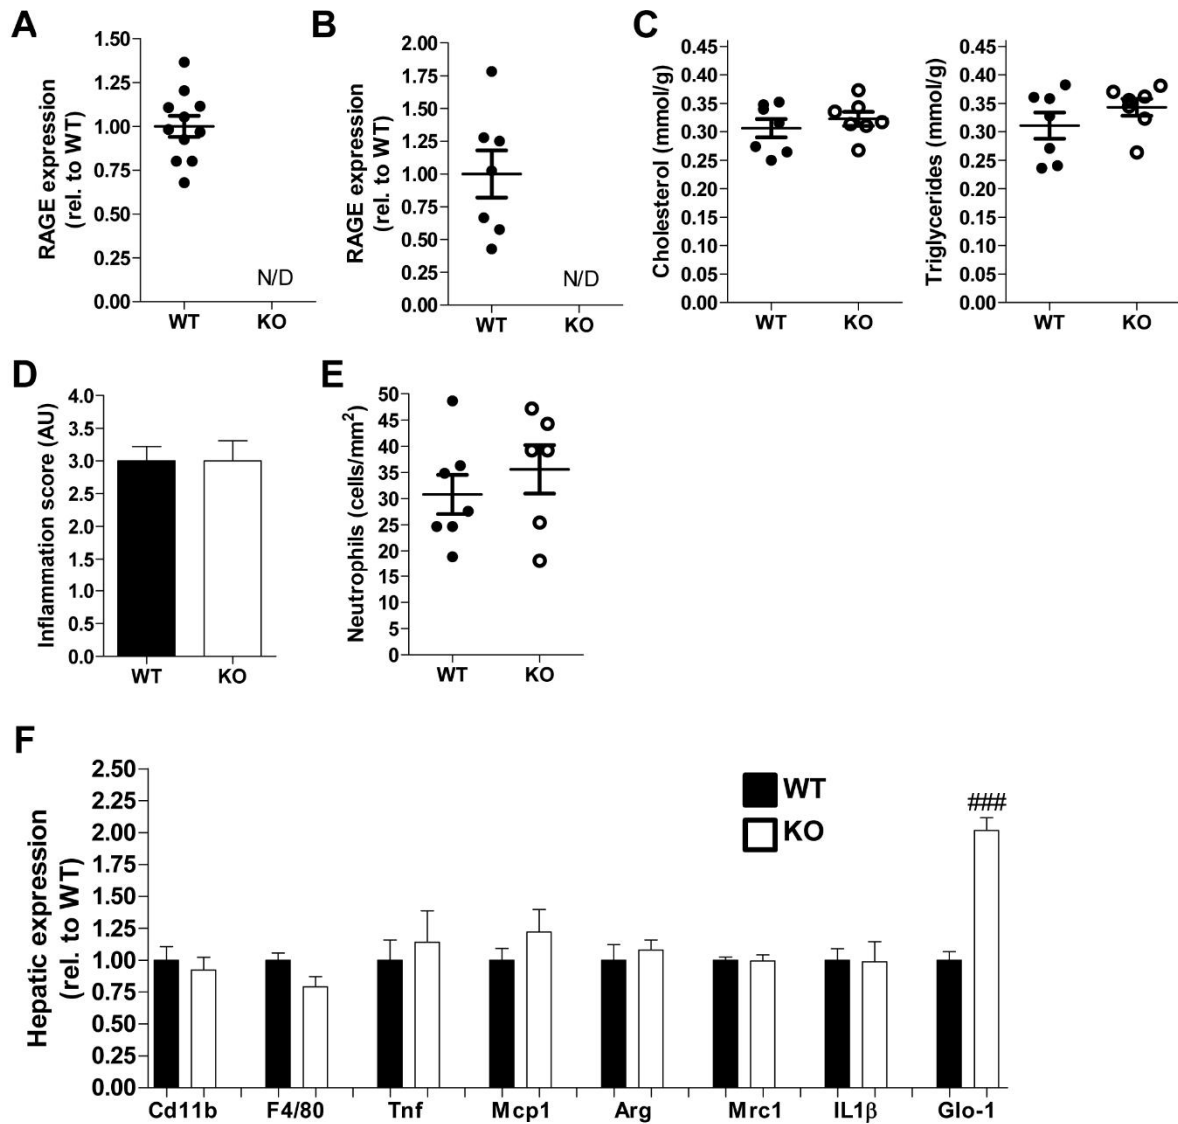

**Suppl. Fig. 3. Hepatic steatosis, neutrophil infiltration and macrophage accumulation were unaffected by RAGE**

(A, B) Hepatic RAGE expression levels after 12 (A; n = 11-12) and 3 weeks (B; n = 7) of WTD feeding. (C) Hepatic cholesterol and triglycerides levels after 3 weeks of WTD feeding. (D) Hepatic inflammation score (1, 2, 3 or 4 based on lobular inflammation and immune cell numbers) after 3 weeks of WTD feeding. (E) Quantification of neutrophils in the liver after 3 weeks of WTD. (F) Hepatic gene expression levels of inflammatory and immune cell specific markers after 3 weeks of WTD feeding. N/D = not detectable. All data are means  $\pm$  SEM. ###P < 0.001 vs WT. n = 7.

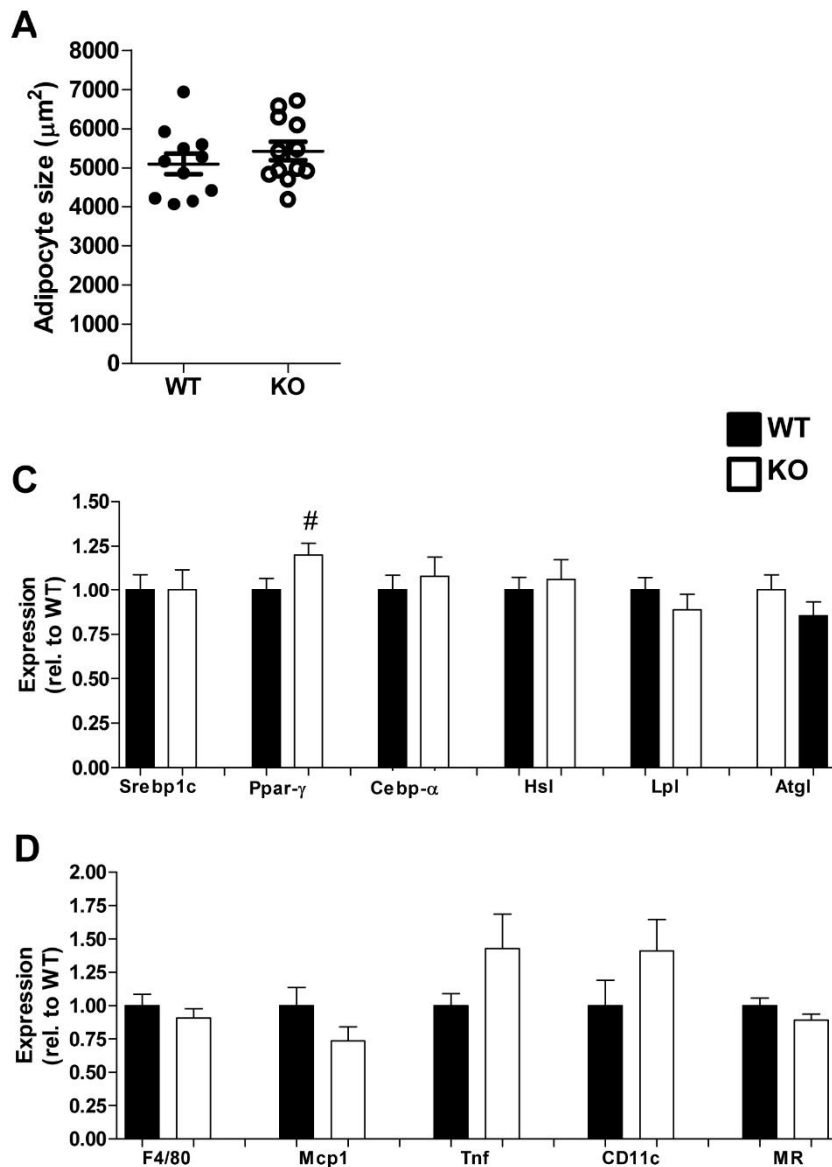

**Suppl. Fig. 4. RAGE deficiency does not influence adipocyte size, lipid metabolism or adipose tissue inflammation**

(A) Adipocyte cell size after 12 weeks of WTD feeding. (B) Lipolysis and adipogenesis related gene expression in the vAT. (C) Gene expression levels of inflammatory and immune cell specific markers in vAT after 12 weeks of WTD feeding. All data are means  $\pm$  SEM. n = 11-12.

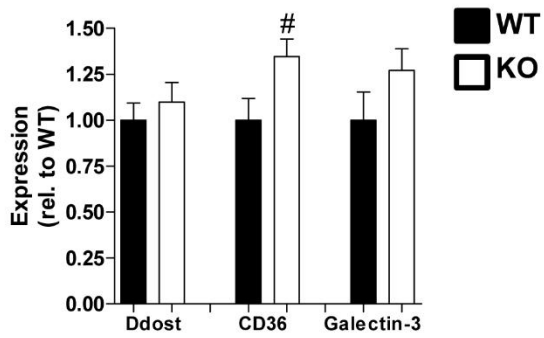

**Suppl. Fig. 5. The absence of RAGE stimulates expression of CD36, but not of other AGE-receptors**

Gene expression levels of the AGE-receptors DDOST, CD36 and Galectin-3 in the liver after 12 weeks of WTD feeding. All data are means  $\pm$  SEM. n = 11-12.

### Suppl. Table 1. Antibodies used for flow cytometry of circulating cells

Flow cytometry antibodies with fluorescent label and manufacturer.

| <b>Antibody</b>  | <b>Label</b> | <b>Manufacturer</b> |
|------------------|--------------|---------------------|
| <b>Blood mix</b> |              |                     |
| CD16/32          | -            | eBioscience         |
| CD45             | PerCP        | Biolegend           |
| CD3              | PE           | eBioscience         |
| NK1.1            | BV421        | Biolegend           |
| LY6G             | APC-H7       | BD                  |
| CD11B            | PE-Cy7       | BD                  |
| LY6C             | APC          | Miltenyi            |
| CD4              | APC-H7       | BD                  |
| CD8              | eFluor450    | eBioscience         |
| CD19             | PE           | eBioscience         |
| SIGLECF          | BV421        | BD                  |

**Suppl. Table 2. Primer sequences**

Forward and reverse qPCR primer sequences of all measured genes.

| <b>Gene</b>                     | <b>FW primer</b>            | <b>RV primer</b>             |
|---------------------------------|-----------------------------|------------------------------|
| <b>Mcp1</b>                     | TTAAAAACCTGGATCGGAACCAA     | GCATTAGCTTCAGATTTACGGGT      |
| <b>Tnf</b>                      | CATCTTCTCAAATTCGAGTGACAA    | TGGGAGTAGACAAGGTACAACCC      |
| <b>F4/80</b>                    | GGATGTACAGATGGGGGATG        | TCTGTGGTGTCAAGTGCAGGT        |
| <b>IL1<math>\beta</math></b>    | CTGCAGCTGGAGAGTGTGGAT       | CACTTTGCTCTTGACTTCTATCTTGTTG |
| <b>Cd11b</b>                    | ATGGACGCTGATGGCAATACC       | TCCCCATTACGTCTCCA            |
| <b>Mrc1</b>                     | TGCCAAAAATTATTGATCCTGTAAC   | CGCCGGCACCTATCACA            |
| <b>Arg1</b>                     | CATGGGCAACCTGTGCCTT         | CGATGTCTTTGGCAGATATGCA       |
| <b>Glo1</b>                     | ATGACGAGACTCAGAGTTACCACAA   | TAGACATCAGGAACGGCAAATCC      |
| <b>RAGE</b>                     | GCTCGAATCCTCCCAATG          | TCCCCTCATCGACAATTCCA         |
| <b>Cd11c</b>                    | CTGGATAGCCTTTCTTGCTG        | GCACACTGTGTCCGAACCTCA        |
| <b>IL-6</b>                     | TTCAACCAAGAGGTAAGATTTACATAA | CACTCCTTCTGTGACTCCAGCTT      |
| <b>iNOS</b>                     | GCCCCTGGAAGTTTCTCTTC        | TTCTGTGCTGTCCCAGTGAG         |
| <b>Col1a1</b>                   | TGTTTCAGCTTTGTGGACCTC       | TCAAGCATACCTCGGGTTTC         |
| <b>Srebp1c</b>                  | ACTTTTCCTTAACGTGGGCCT       | ACTTTTCCTTAACGTGGGCCT        |
| <b>Ppar-<math>\gamma</math></b> | ATGATGGGAGAAGATAAAATCAAGTTC | CGGCTTCTACGGATCGAAAC         |
| <b>Cebp-<math>\alpha</math></b> | GCGGGAACGCAACAACATC         | GTCACTGGTCAACTCCAGCAC        |
| <b>Hsl</b>                      | GAGGCCTTTGAGATGCCACT        | AGATGAGCCTGGCTAGCACAG        |
| <b>Lpl</b>                      | TGGCGTAGCAGGAAGTCTGA        | TGCCTCCATTGGGATAAATGTC       |
| <b>Atgl</b>                     | AGCATCTGCCAGTATCTGGTGAT     | CACCTGCTCAGACAGTCTGGA        |
| <b>Ddost</b>                    | CCCGGACAATCCCTTGTTT         | TGAGAATACCTCTGCGCACC         |
| <b>Cd36</b>                     | GGAGCCATCTTTGAGCCTTCA       | GAACCAAAGTGAAGGATGATCT       |
| <b>Galectin-3</b>               | CCCGCATGCTGATCACAATC        | GGGGTTAAAGTGAAGGCAA          |
| <b>Cyclophilin</b>              | TTCCTCCTTTACAGAATTATTCCA    | CCGCCAGTGCCATTATGG           |
| <b>B2-Micro</b>                 | CTTTCTGGTGCTTGTCTCACTGA     | GTATGTTCCGGCTTCCCATTCTC      |



**Suppl. Table 3. RAGE deficiency does not affect circulating immune cells**

Levels of circulating T-cells, B-cells, neutrophils, NK-cells and eosinophils measured by flow cytometry in cells/ $\mu$ l after 12 weeks of WTD feeding. n = 11-12.

| Cell type                         | WT (Mean $\pm$ SEM) | KO (Mean $\pm$ SEM) |
|-----------------------------------|---------------------|---------------------|
| All immune cells (cells/ $\mu$ l) | 6268 $\pm$ 499      | 7309 $\pm$ 824      |
| CD4 T-cells (cells/ $\mu$ l)      | 590 $\pm$ 53        | 731 $\pm$ 86        |
| CD8 T-cells (cells/ $\mu$ l)      | 591 $\pm$ 37        | 625 $\pm$ 72        |
| B-cells (cells/ $\mu$ l)          | 2744 $\pm$ 303      | 3741 $\pm$ 471      |
| Neutrophils (cells/ $\mu$ l)      | 911 $\pm$ 289       | 1075 $\pm$ 245      |
| NK-cells (cells/ $\mu$ l)         | 425 $\pm$ 77        | 296 $\pm$ 26        |
| Eosinophils (cells/ $\mu$ l)      | 63,8 $\pm$ 11,2     | 109,3 $\pm$ 27,3    |

**Suppl. Table 4. Circulating immune cells are not affected by RAGE**

Levels of circulating T-cells, B-cells, neutrophils, NK-cells and eosinophils measured by flow cytometry in cells/ $\mu$ l after 3 weeks of WTD feeding. #P < 0.05 vs WT. n = 7.

| Cell type                         | WT (Mean $\pm$ SEM) | KO (Mean $\pm$ SEM)         |
|-----------------------------------|---------------------|-----------------------------|
| All immune cells (cells/ $\mu$ l) | 10969 $\pm$ 393     | 12570 $\pm$ 723             |
| CD4 T-cells (cells/ $\mu$ l)      | 1656 $\pm$ 124      | 1832 $\pm$ 139              |
| CD8 T-cells (cells/ $\mu$ l)      | 1204 $\pm$ 79       | 1221 $\pm$ 76               |
| B-cells (cells/ $\mu$ l)          | 5448 $\pm$ 213      | 6929 $\pm$ 456 <sup>#</sup> |
| Neutrophils (cells/ $\mu$ l)      | 657 $\pm$ 70        | 684 $\pm$ 97                |
| NK-cells (cells/ $\mu$ l)         | 257 $\pm$ 21        | 230 $\pm$ 18                |
| Eosinophils (cells/ $\mu$ l)      | 138 $\pm$ 16        | 177 $\pm$ 20                |

**Suppl. Table 5. Free AGE levels in the vAT are not affected by RAGE-deficiency**

The CML, CEL and MG-H1 levels in the vAT after 12 weeks of WTD. n = 11-12. N/D = not detectable.

| vAT AGE levels | WT (Mean $\pm$ SEM) | KO (Mean $\pm$ SEM) |
|----------------|---------------------|---------------------|
| CML (nmol/g)   | 78,7 $\pm$ 15,1     | 86,0 $\pm$ 15,2     |
| CEL (nmol/g)   | N/D                 | N/D                 |
| MG-H1 (nmol/g) | 4,08 $\pm$ 0,64     | 3,84 $\pm$ 0,71     |
